# Supplementary material
Source: PubMed Central journal article supplement (PMC2746894)

1  
2  
3  
4  
5  
6  
7  
8  
9  
10  
11  
12  
13  
14  
15  
16  
17  
18  
19  
20  
21  
22  
23  
24  
25  
26  
27  
28  
29  
30  
31  
32  
33  
34  
35  
36  
37  
38  
39  
40  
41  
42  
43  
44  
45  
46  
47  
48  
49  
50  
51  
52  
53  
54  
55  
56  
57  
58  
59  
60

**Supplementary Fig. 1.** Linear correlation between transposable elements and chromosome length as exemplified for the human genome. The total number of transposable elements (total), as well as the number of long interspersed nuclear elements (SINEs), long interspersed nuclear elements (LINEs), long terminal repeats (LTRs), and DNA transposons per chromosome were plotted against chromosome length.

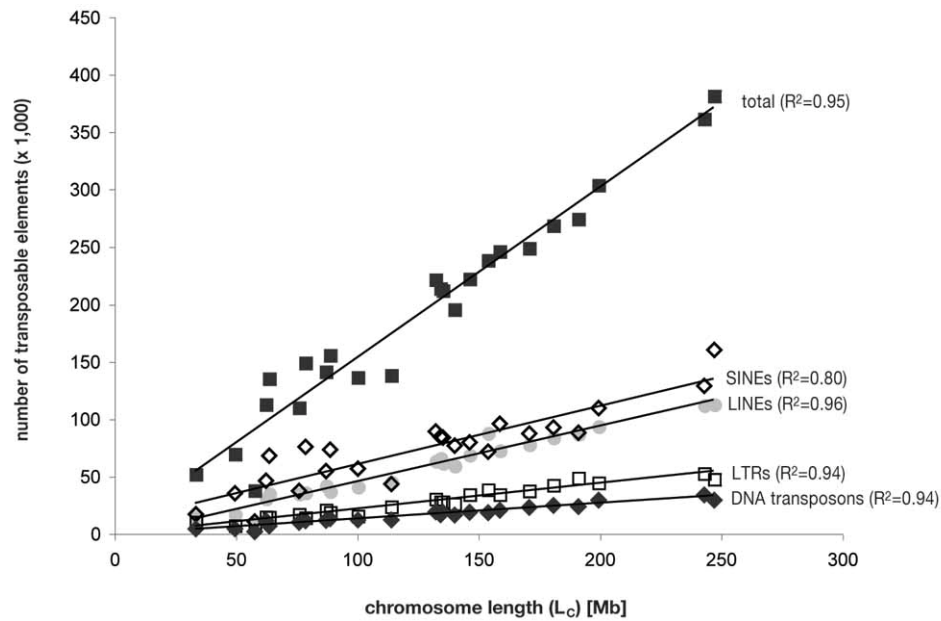

Supplement: 239_2009_9251_MOESM1_ESM.pdf [file 239_2009_9251_MOESM1_ESM.pdf]
